# Supplementary material for: Association between short-term exposure to air pollution and ischemic stroke onset: a time-stratified case-crossover analysis using a distributed lag nonlinear model in Shenzhen, China
Source: PubMed Central journal article supplement (PMC6941275; doi:10.1186/s12940-019-0557-4), 2020-01-02
Supplement: 12940_2019_557_MOESM1_ESM.pdf [file 12940_2019_557_MOESM1_ESM.pdf]

## Supplemental Material

### Association between short-term exposure to air pollution and ischemic stroke onset: a time-stratified case-crossover analysis using a distributed lag nonlinear model in Shenzhen, China

Zhinghui Wang, Ji Peng, Peiyi Liu, Yanran Duan, Suli Huang, Ying Wen, Yi Liao, Hongyan Li, Siyu Yan, Jinquan Cheng, Ping Yin

### Table of Contents

**Table S1** Extreme influence analysis of different air pollution factors from 2008 to 2014 using two-pollutant models. Relative risk (*RR*) and 95% confidence interval (*CI*) were used to estimate the single lag day and cumulative influence of air pollution factors in total cases.

**Figure S1** Summary of single day lag-response curves on ischemic stroke for air pollution factors (SO<sub>2</sub>, NO<sub>2</sub>, PM<sub>10</sub> and O<sub>3</sub>) for all groups at different lags using single-pollutant model in Shenzhen, 2008-2014. The extreme-high influence was estimated by the *RR* of ischemic stroke by comparing the 99th percentile of daily air pollution value to the median value, whereas the extreme-low influence was estimated by comparing the 1st percentile of daily air pollution value to the median value. The elderly and adult were subgroups according to age (adult: 18-64 years; the elderly:  $\geq 65$  years).

**Figure S2** Summary of cumulative exposure-response curves on ischemic stroke for air pollution factors (SO<sub>2</sub>, NO<sub>2</sub>, PM<sub>10</sub> and O<sub>3</sub>) for all groups at lag0-14 using single-pollutant model in Shenzhen, 2008-2014. Male and female were subgroups according to gender. The elderly and adult were subgroups according to age (adult: 18-64 years; the elderly:  $\geq 65$  years).

**Figure S3** Summary of single day lag-response curves on ischemic stroke for air pollution factors (SO<sub>2</sub>, NO<sub>2</sub>, PM<sub>10</sub> and O<sub>3</sub>) for subgroups at different lags using two-pollutant model in Shenzhen, 2008-2014. The extreme-high influence was estimated by the *RR* of ischemic stroke by comparing the 99th percentile of daily air pollution value

to the median value, whereas the extreme-low influence was estimated by comparing the 1st percentile of daily air pollution value to the median value. The elderly and adult were subgroups according to age (adult: 18-64 years; the elderly:  $\geq 65$  years).

**Figure S4** Summary of cumulative exposure-response curves on ischemic stroke for air pollution factors (SO<sub>2</sub>, NO<sub>2</sub>, PM<sub>10</sub> and O<sub>3</sub>) for total cases at lag0-1, lag0-6 and lag0-14 using two-pollutant model in Shenzhen, 2008-2014.

**Figure S5** Summary of single day lag-response curves on ischemic stroke for air pollution factors (SO<sub>2</sub>, NO<sub>2</sub>, PM<sub>10</sub> and O<sub>3</sub>) for total cases at different lags using two-pollutant model by changing the df (2-6) of air pollution in Shenzhen, 2008-2014. The extreme-high influence was estimated by the *RR* of ischemic stroke by comparing the 99th percentile of daily air pollution value to the median value, whereas the extreme-low influence was estimated by comparing the 1st percentile of daily air pollution value to the median value.

**Figure S6** Summary of cumulative exposure-response curves on ischemic stroke for air pollution factors (SO<sub>2</sub>, NO<sub>2</sub>, PM<sub>10</sub> and O<sub>3</sub>) for total cases at lag0-14 using two-pollutant model by changing the df (2-6) of air pollution in Shenzhen, 2008-2014.

**Figure S7** Summary of single day lag-response curves on ischemic stroke for air pollution factors (SO<sub>2</sub>, NO<sub>2</sub>, PM<sub>10</sub> and O<sub>3</sub>) for total cases at different lags using two-pollutant model by changing the df (2-6) of lag space in Shenzhen, 2008-2014. The extreme-high influence was estimated by the *RR* of ischemic stroke by comparing the 99th percentile of daily air pollution value to the median value, whereas the extreme-low influence was estimated by comparing the 1st percentile of daily air pollution value to the median value.

**Figure S8** Summary of cumulative exposure-response curves on ischemic stroke for air pollution factors (SO<sub>2</sub>, NO<sub>2</sub>, PM<sub>10</sub> and O<sub>3</sub>) for total cases at lag0-14 using two-pollutant model by changing the df (2-6) of lag space in Shenzhen, 2008-2014.

**Figure S9** Summary of single day lag-response curves on ischemic stroke for air pollution factors (SO<sub>2</sub>, NO<sub>2</sub>, PM<sub>10</sub> and O<sub>3</sub>) for total cases at different lags using two-pollutant model by changing the maximum lag days (12-21 days) for air pollution in Shenzhen, 2008-2014. The extreme-high influence was estimated by the *RR* of ischemic stroke by comparing the 99th percentile of daily air pollution value to the median value, whereas the extreme-low influence was estimated by comparing the 1st percentile of daily air pollution value to the median value.

**Figure S10** Summary of cumulative exposure-response curves on ischemic stroke for air pollution factors (SO<sub>2</sub>, NO<sub>2</sub>, PM<sub>10</sub> and O<sub>3</sub>) for total cases at lag0-14 using two-pollutant model by changing the maximum lag days (12-21 days) for air pollution in Shenzhen, 2008-2014.

**Table S1 Extreme influence analysis of different air pollution factors from 2008 to 2014 using two-pollutant models. Relative risk (*RR*) and 95% confidence interval (*CI*) were used to estimate the single lag day and cumulative influence of air pollution factors in total cases.**

| pollutant        | extreme-low influence |                 |                 | extreme-high influence |                 |                 |
|------------------|-----------------------|-----------------|-----------------|------------------------|-----------------|-----------------|
|                  | lag0                  | lag1            | lag0-1          | lag0                   | lag1            | lag0-1          |
| SO <sub>2</sub>  | 0.99(0.96,1.02)       | 0.99(0.97,1.02) | 0.98(0.92,1.03) | 0.97(0.93,1.01)        | 0.99(0.95,1.02) | 0.95(0.88,1.03) |
| NO <sub>2</sub>  | 0.97(0.94,1.00)       | 0.97(0.95,1.00) | 0.95(0.89,1.01) | 1.06(1.01,1.11)        | 1.05(1.02,1.09) | 1.11(1.03,1.20) |
| PM <sub>10</sub> | 0.96(0.92,1.00)       | 0.96(0.93,0.99) | 0.92(0.86,0.99) | 0.98(0.94,1.02)        | 0.99(0.96,1.03) | 0.97(0.91,1.05) |
| O <sub>3</sub>   | 1.02(0.99,1.05)       | 1.02(0.99,1.04) | 1.04(0.96,1.13) | 1.01(0.98,1.03)        | 1.01(0.99,1.03) | 1.01(0.95,1.08) |

Note: Estimates were generated using a quasi-Poisson regression model combined with time-stratified case-crossover design and distributed lag non-linear model (DLNM), adjusting for meteorological factors, holiday, and time stratum. The extreme-high influence was estimated by the *RR* of ischemic stroke by comparing the 99th percentile of daily air pollution value to the median value, whereas the extreme-low influence was estimated by comparing the 1st percentile of daily air pollution value to the median value.

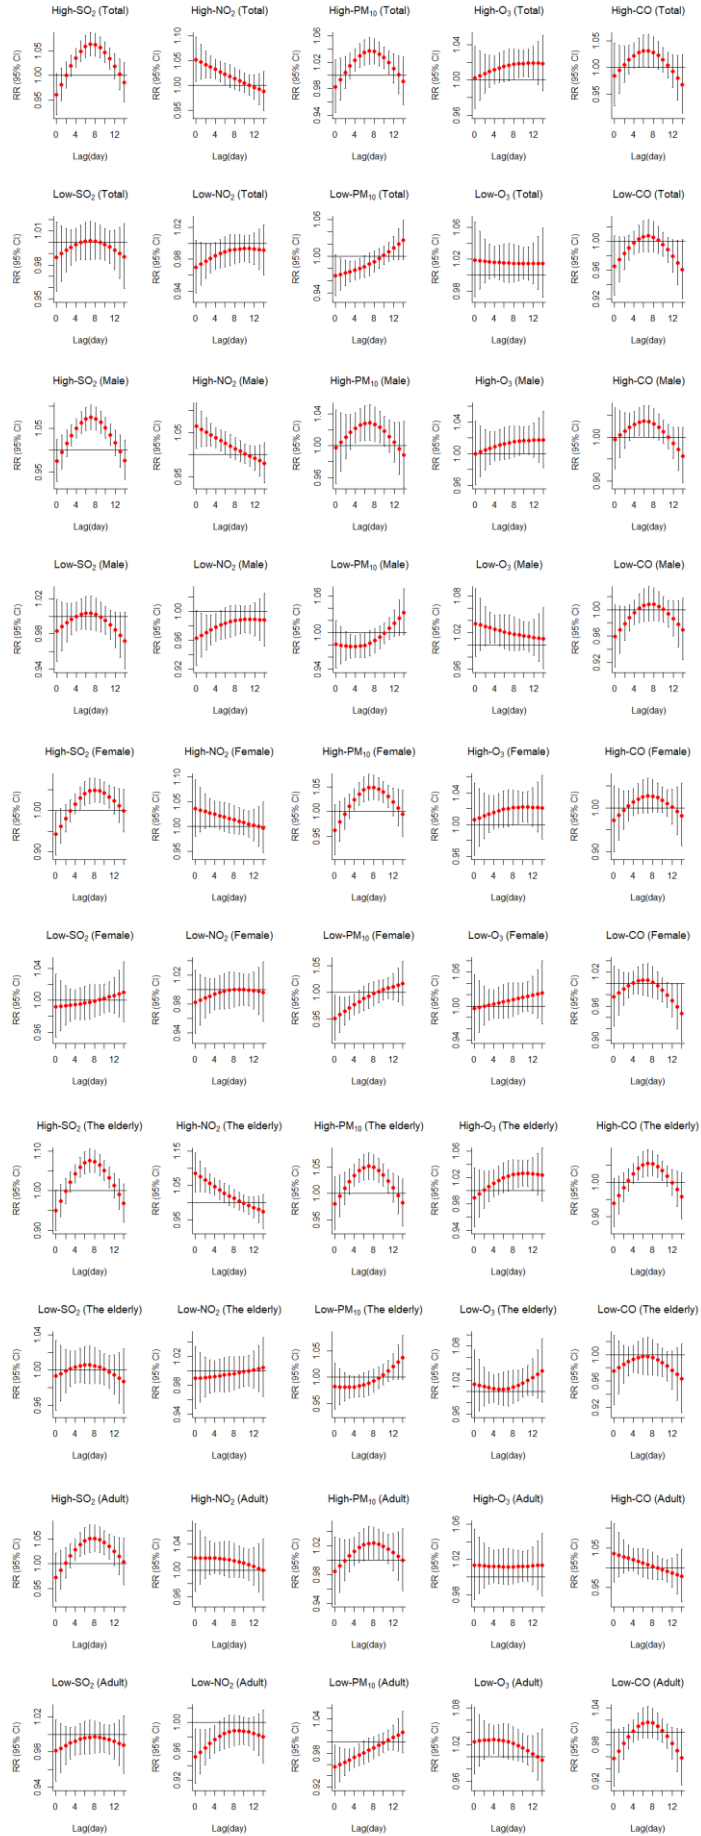

**Figure S1** Summary of single day lag-response curves on ischemic stroke for air pollution factors (SO<sub>2</sub>, NO<sub>2</sub>, PM<sub>10</sub> and O<sub>3</sub>) for all groups at different lags using single-pollutant model in Shenzhen, 2008-2014. The extreme-high influence was estimated by the *RR* of ischemic stroke by comparing the 99th percentile of daily air pollution value to the median value, whereas the extreme-low influence was estimated by comparing the 1st percentile of daily air pollution value to the median value. The elderly and adult were subgroups according to age (adult: 18-64 years; the elderly:  $\geq 65$  years).

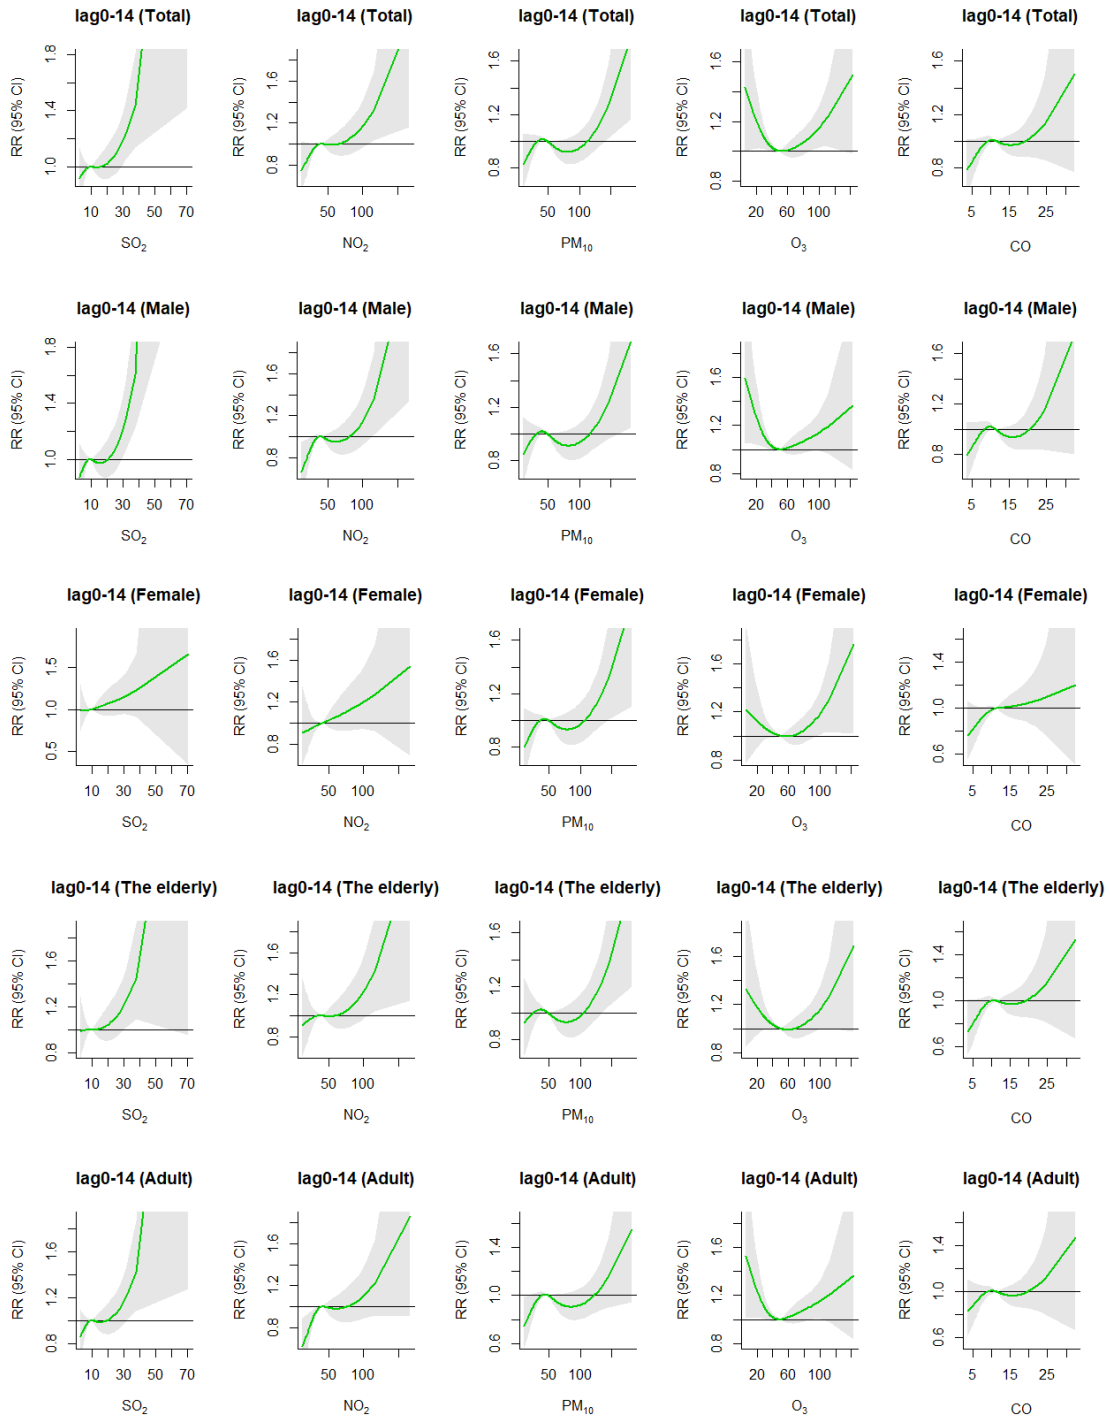

**Figure S2** Summary of cumulative exposure-response curves on ischemic stroke for air pollution factors (SO<sub>2</sub>, NO<sub>2</sub>, PM<sub>10</sub> and O<sub>3</sub>) for all groups at lag0-14 using single-pollutant model in Shenzhen, 2008-2014. Male and female were subgroups according to gender. The elderly and adult were subgroups according to age (adult: 18-64 years; the elderly:  $\geq 65$  years).

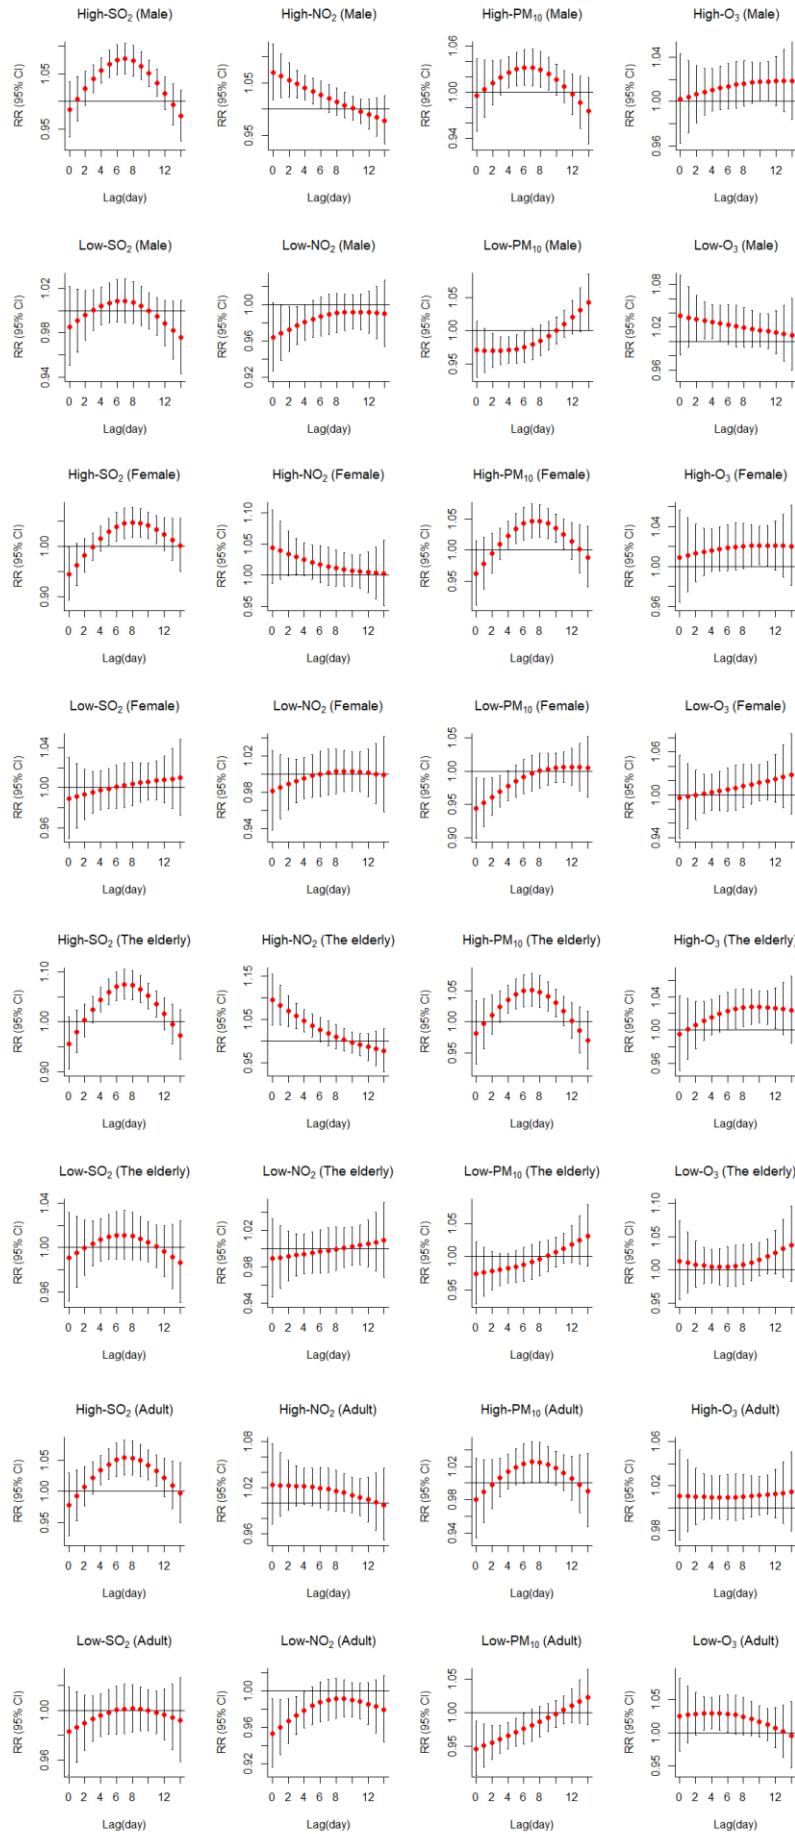

**Figure S3** Summary of single day lag-response curves on ischemic stroke for air pollution factors (SO<sub>2</sub>, NO<sub>2</sub>, PM<sub>10</sub> and O<sub>3</sub>) for subgroups at different lags using two-pollutant model in Shenzhen, 2008-2014. The extreme-high influence was estimated by the *RR* of ischemic stroke by comparing the 99th percentile of daily air pollution value to the median value, whereas the extreme-low influence was estimated by comparing the 1st percentile of daily air pollution value to the median value. The elderly and adult were subgroups according to age (adult: 18-64 years; the elderly:  $\geq 65$  years).



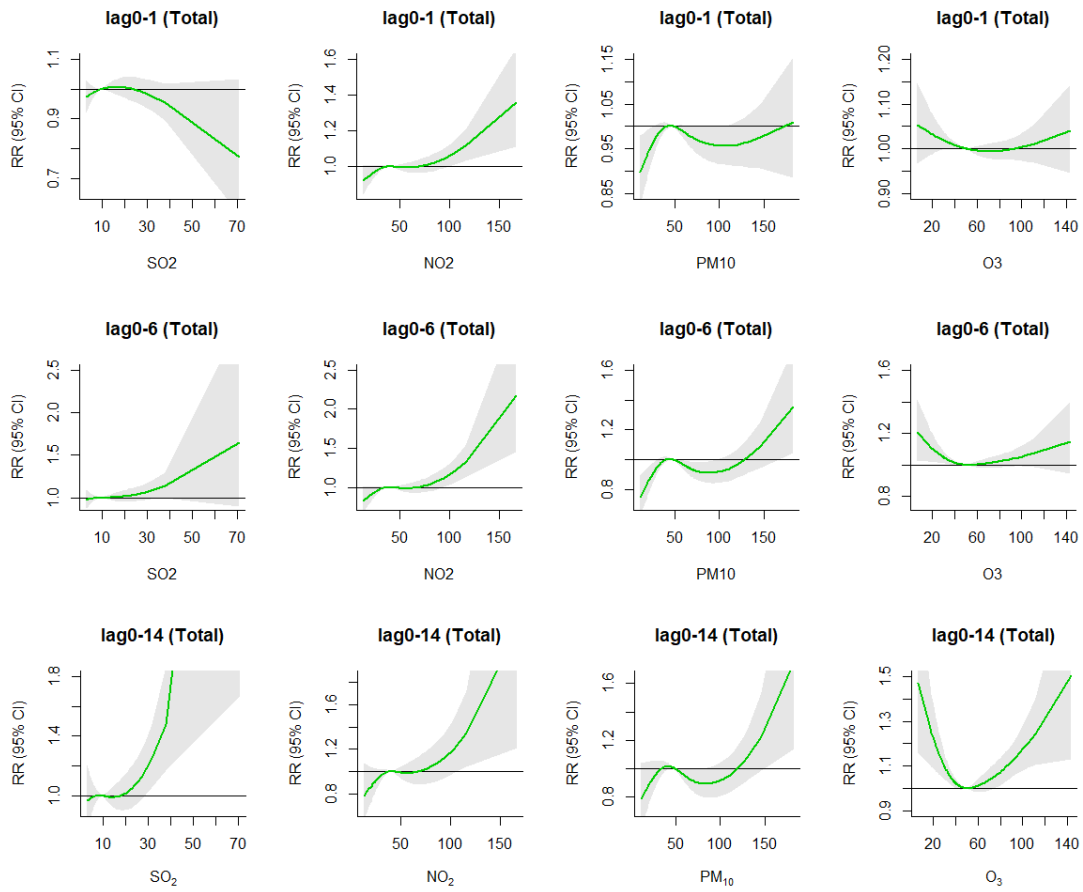

**Figure S4** Summary of cumulative exposure-response curves on ischemic stroke for air pollution factors (SO<sub>2</sub>, NO<sub>2</sub>, PM<sub>10</sub> and O<sub>3</sub>) for total cases at lag0-1, lag0-6 and lag0-14 using two-pollutant model in Shenzhen, 2008-2014.

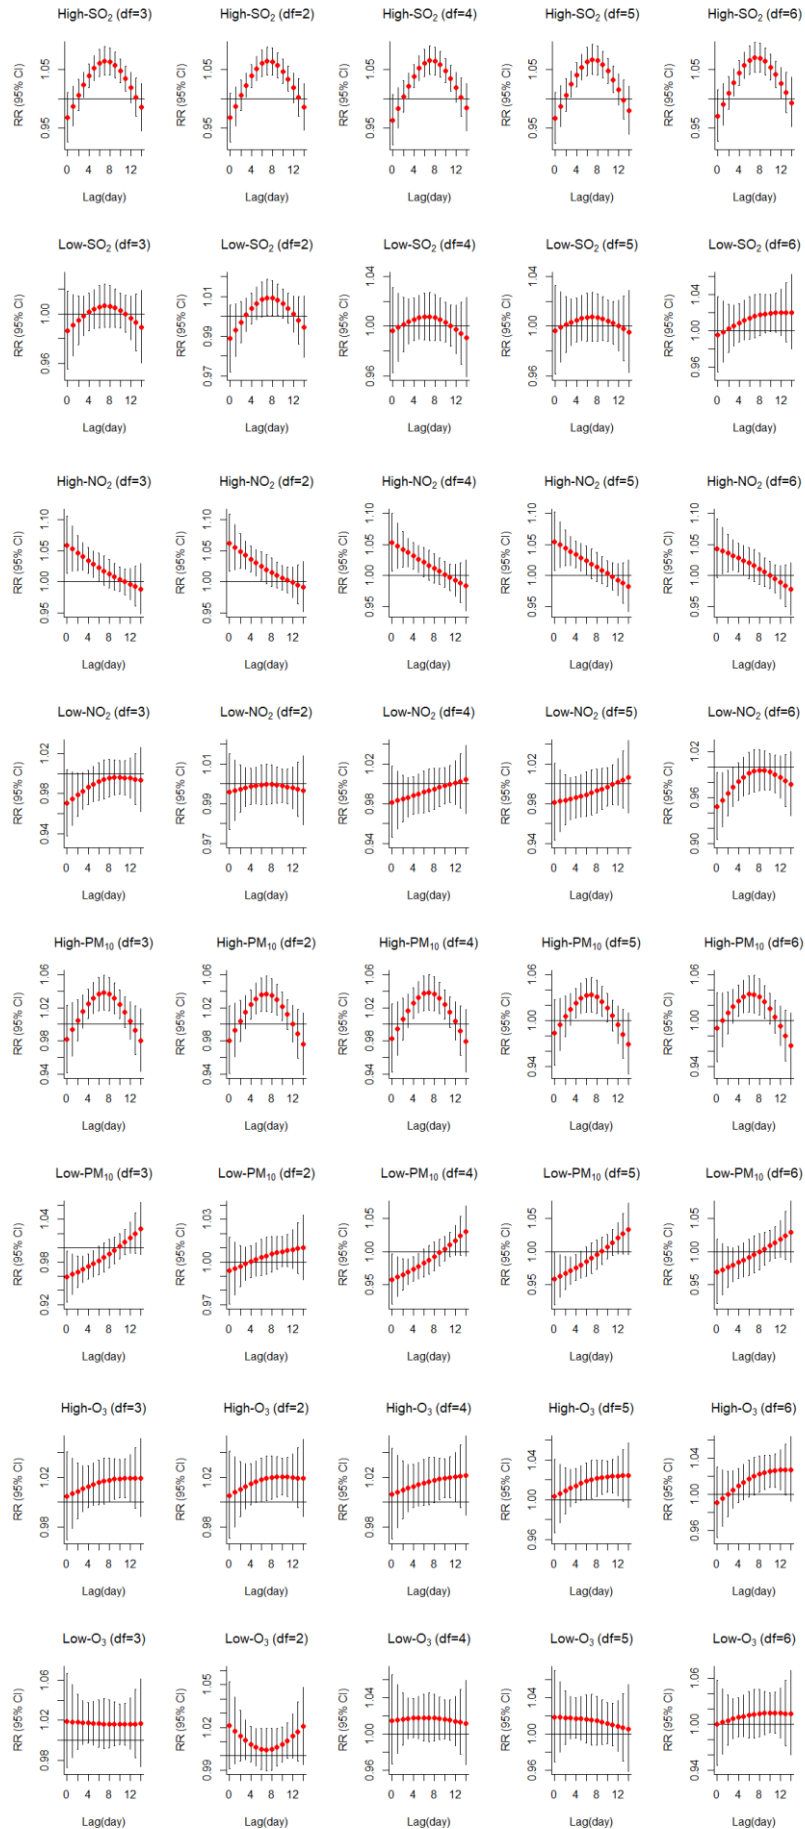

**Figure S5** Summary of single day lag-response curves on ischemic stroke for air pollution factors (SO<sub>2</sub>, NO<sub>2</sub>, PM<sub>10</sub> and O<sub>3</sub>) for total cases at different lags using two-pollutant model by changing the df (2-6) of air pollution in Shenzhen, 2008-2014. The extreme-high influence was estimated by the *RR* of ischemic stroke by comparing the 99th percentile of daily air pollution value to the median value, whereas the extreme-low influence was estimated by comparing the 1st percentile of daily air pollution value to the median value.

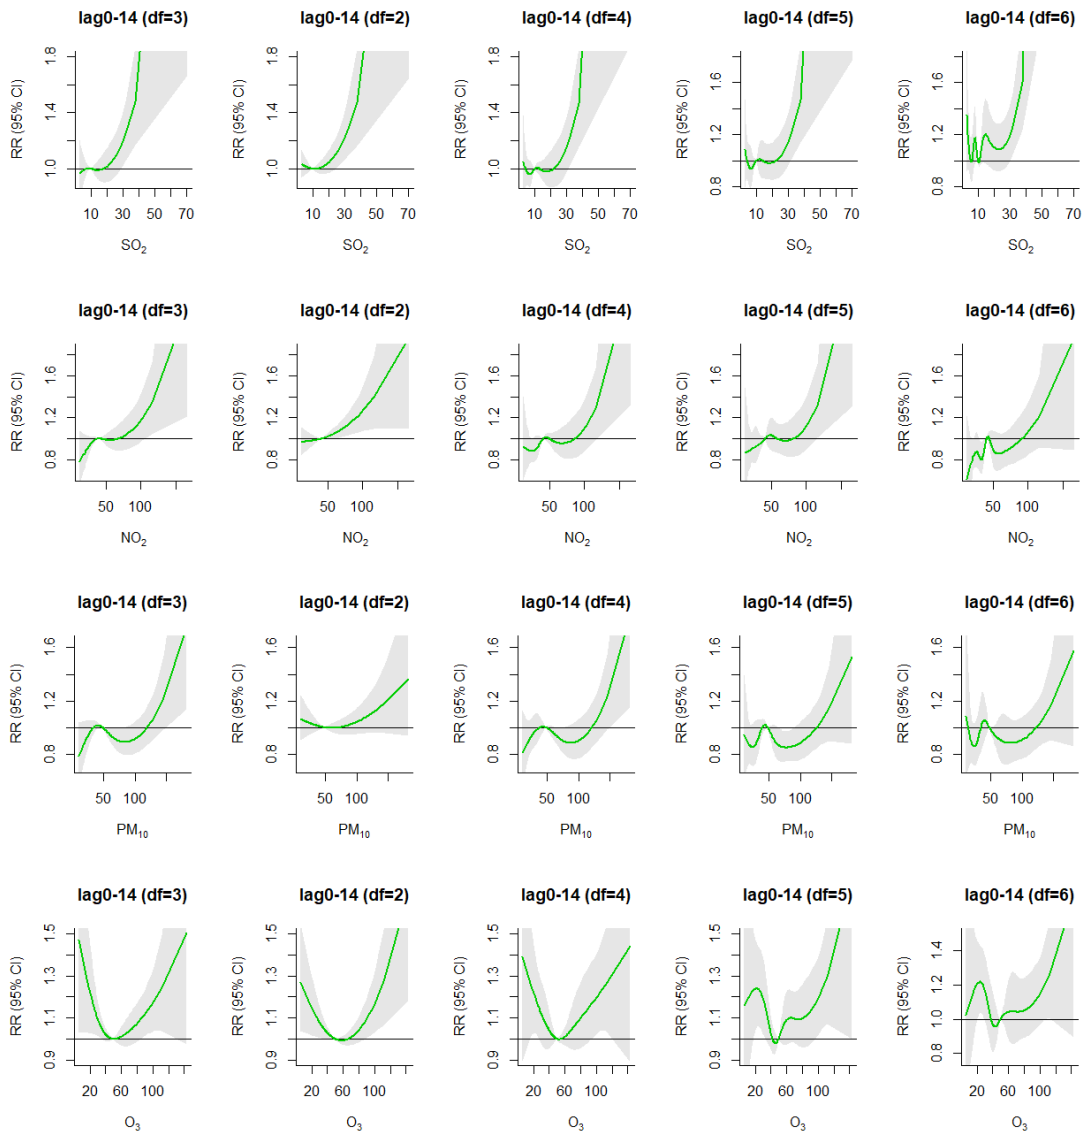

**Figure S6** Summary of cumulative exposure-response curves on ischemic stroke for air pollution factors (SO<sub>2</sub>, NO<sub>2</sub>, PM<sub>10</sub> and O<sub>3</sub>) for total cases at lag0-14 using two-pollutant model by changing the df (2-6) of air pollution in Shenzhen, 2008-2014.

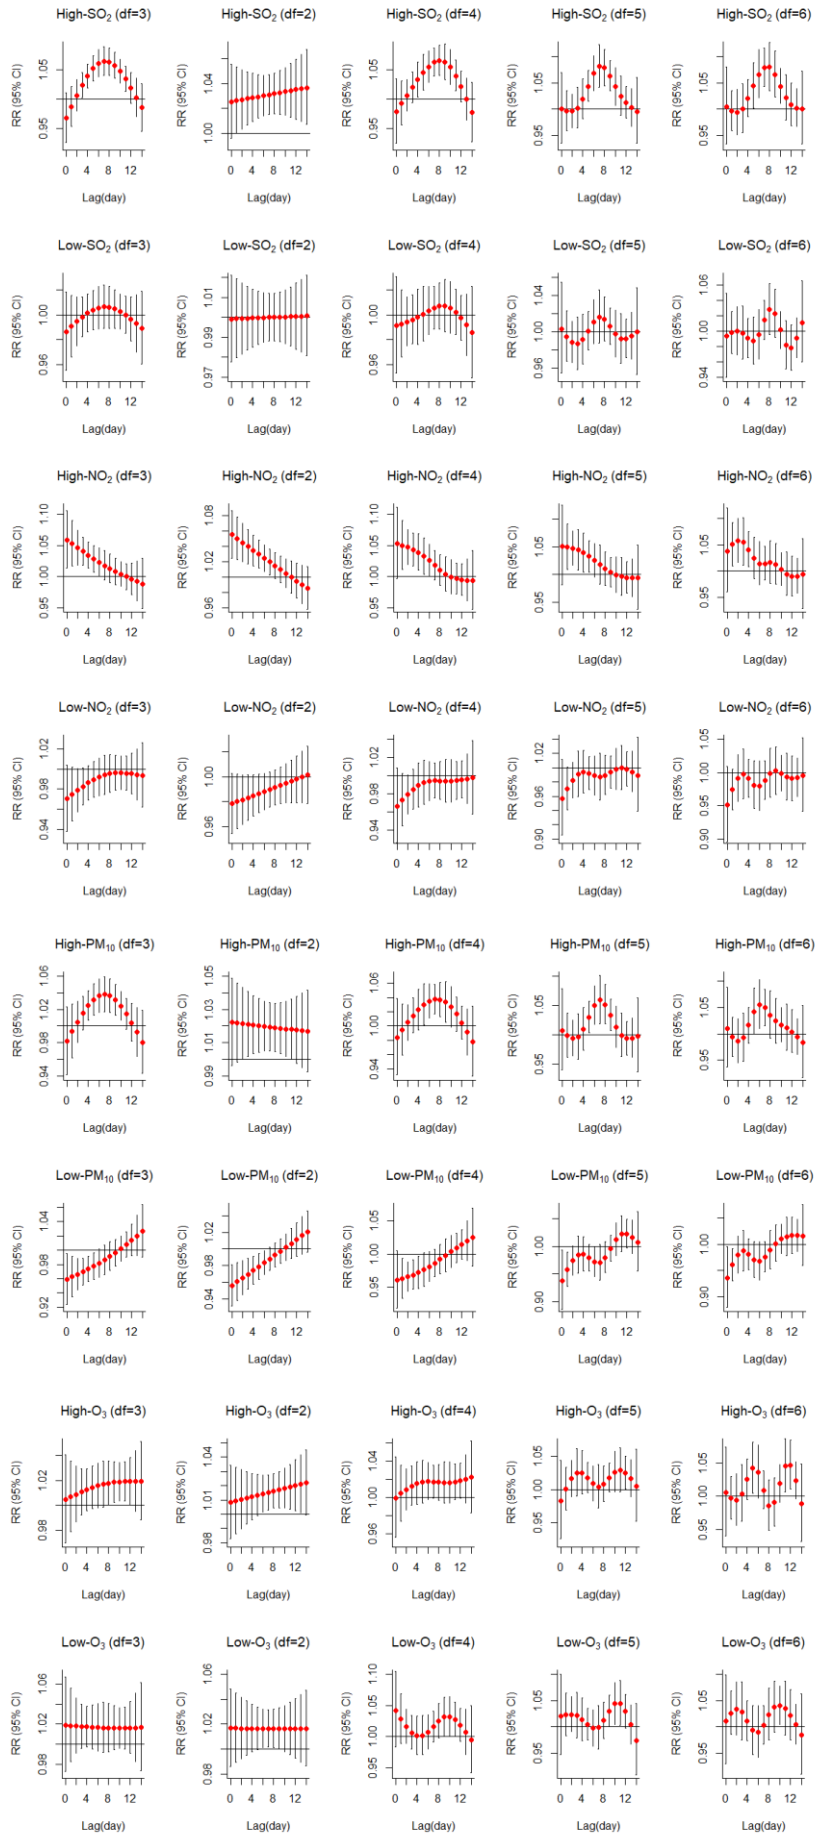

**Figure S7** Summary of single day lag-response curves on ischemic stroke for air pollution factors (SO<sub>2</sub>, NO<sub>2</sub>, PM<sub>10</sub> and O<sub>3</sub>) for total cases at different lags using two-pollutant model by changing the df (2-6) of lag space in Shenzhen, 2008-2014. The extreme-high influence was estimated by the *RR* of ischemic stroke by comparing the 99th percentile of daily air pollution value to the median value, whereas the extreme-low influence was estimated by comparing the 1st percentile of daily air pollution value to the median value.

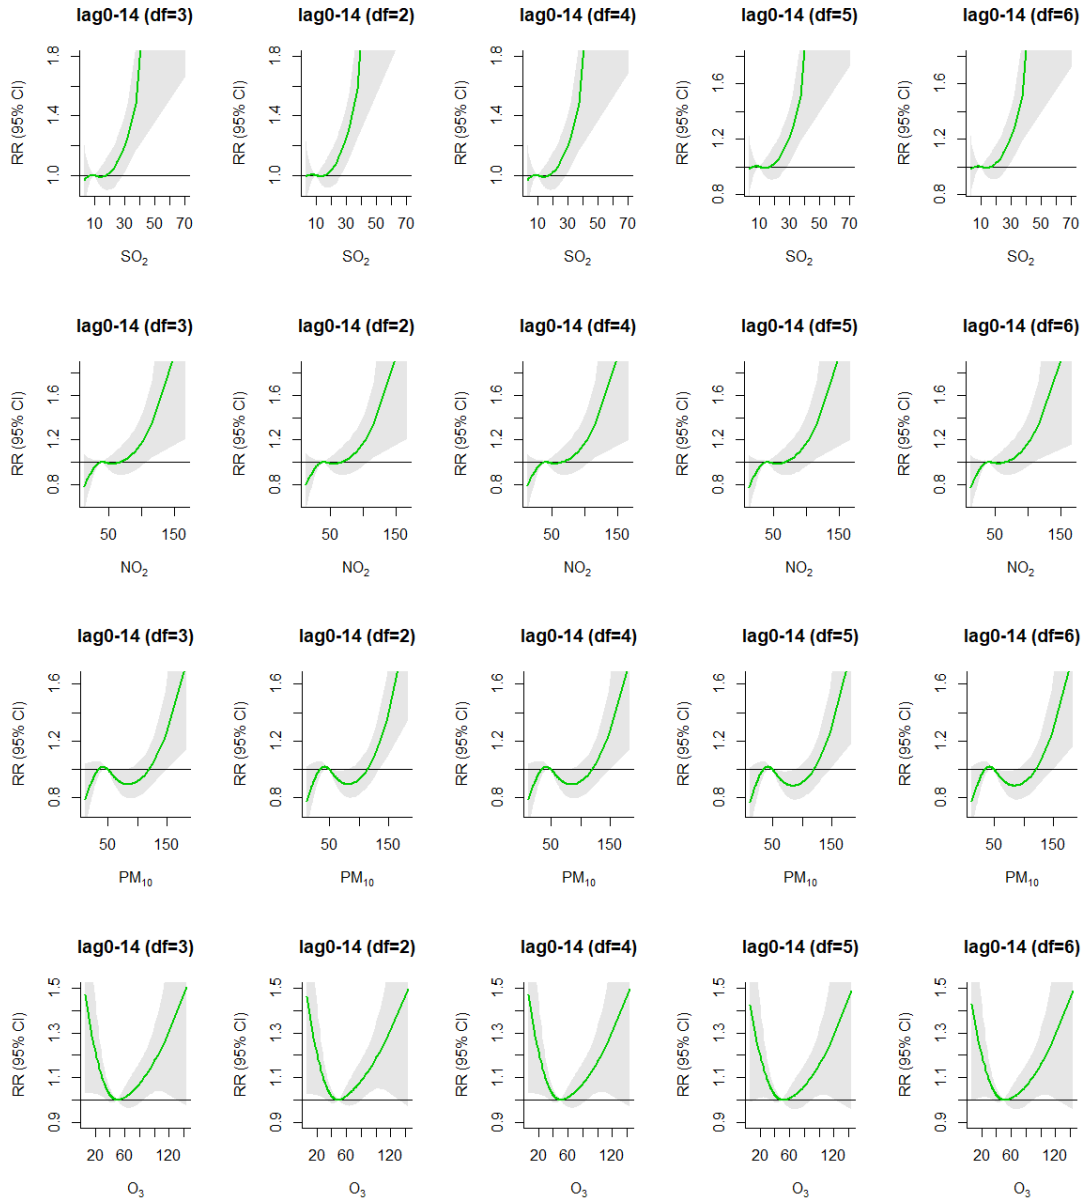

**Figure S8** Summary of cumulative exposure-response curves on ischemic stroke for air pollution factors (SO<sub>2</sub>, NO<sub>2</sub>, PM<sub>10</sub> and O<sub>3</sub>) for total cases at lag0-14 using two-pollutant model by changing the df (2-6) of lag space in Shenzhen, 2008-2014.

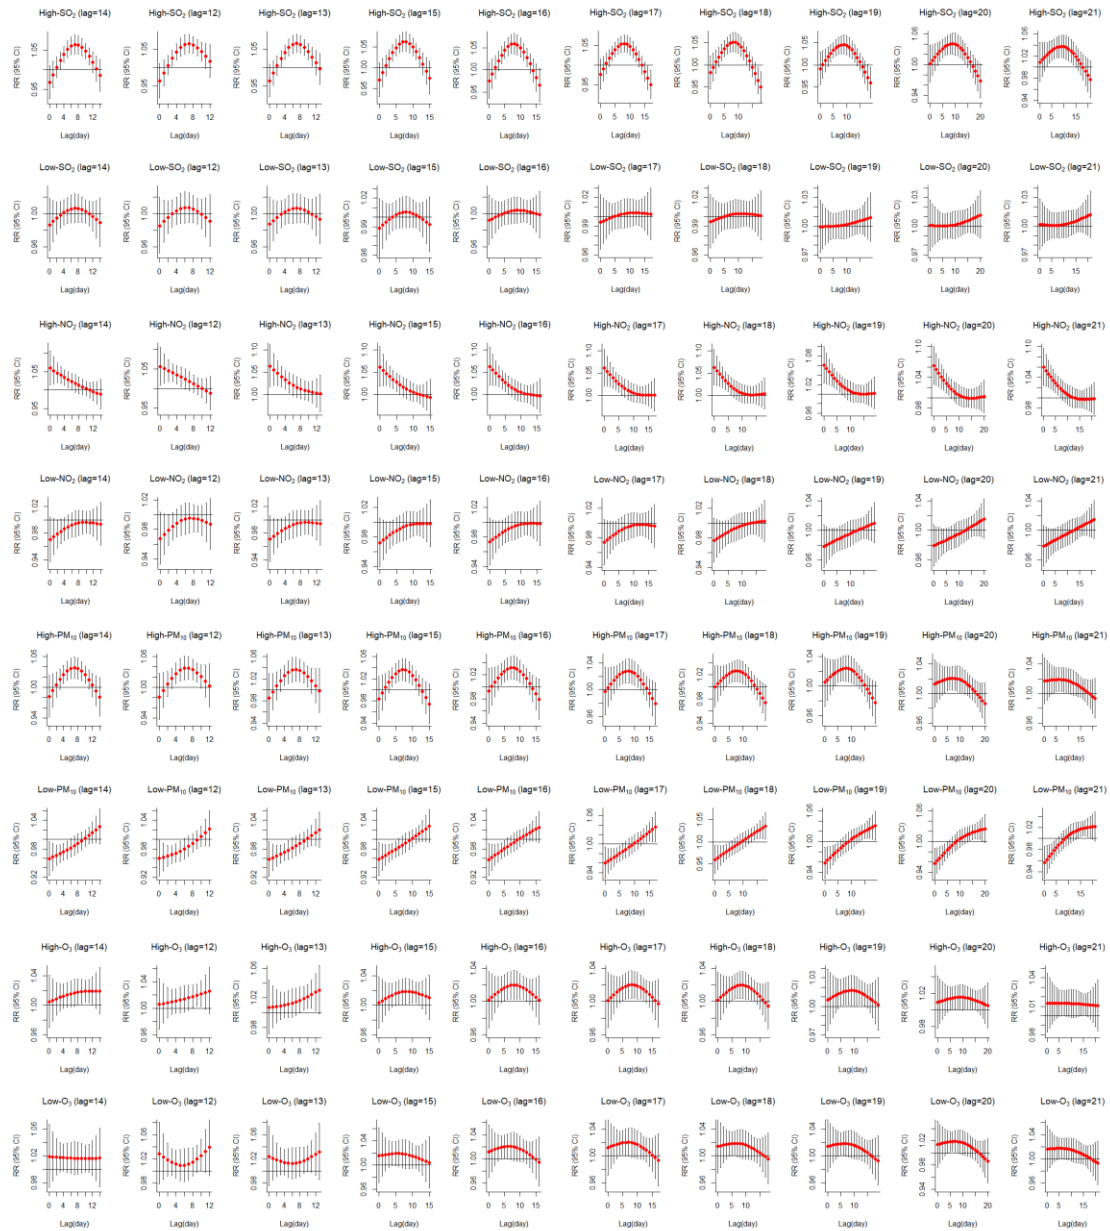

**Figure S9** Summary of single day lag-response curves on ischemic stroke for air pollution factors (SO<sub>2</sub>, NO<sub>2</sub>, PM<sub>10</sub> and O<sub>3</sub>) for total cases at different lags using two-pollutant model by changing the maximum lag days (12-21 days) for air pollution in Shenzhen, 2008-2014. The extreme-high influence was estimated by the *RR* of ischemic stroke by comparing the 99th percentile of daily air pollution value to the median value, whereas the extreme-low influence was estimated by comparing the 1st percentile of daily air pollution value to the median value.



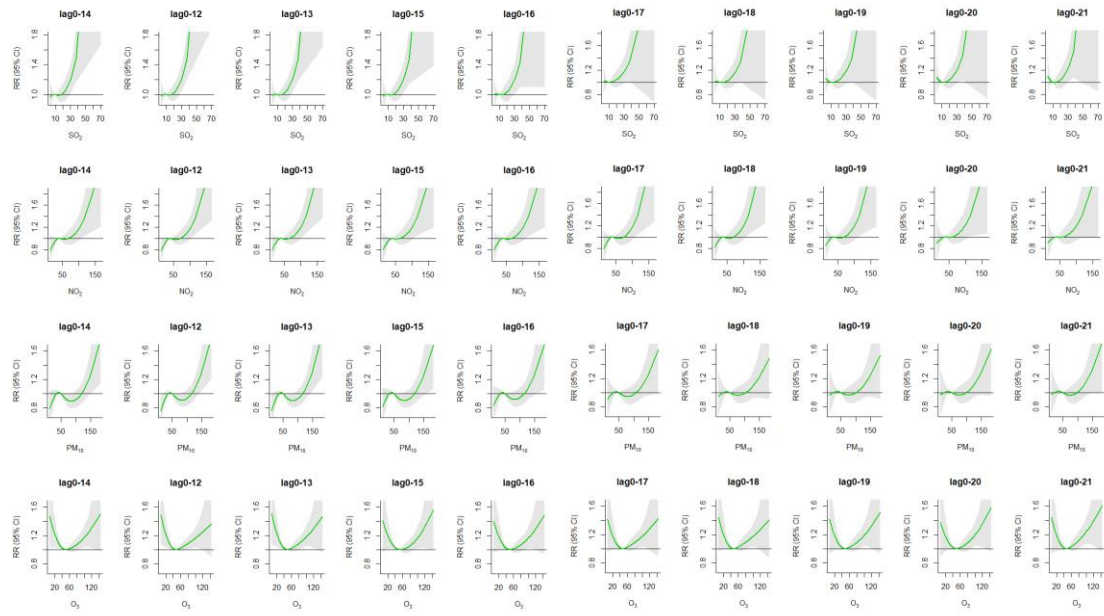

**Figure S10** Summary of cumulative exposure-response curves on ischemic stroke for air pollution factors (SO<sub>2</sub>, NO<sub>2</sub>, PM<sub>10</sub> and O<sub>3</sub>) for total cases at lag0-14 using two-pollutant model by changing the maximum lag days (12-21 days) for air pollution in Shenzhen, 2008-2014.
